# Supplementary material
Source: publisher figshare collection journal article supplement (https://geolsoc.figshare.com/ndownloader/files/34180090)
Supplement: Supplementary file 1 [file 34180090]

#NEXUS
BEGIN TREES;

	UTREE 1 = (Amphimedon_queenslandica: 7.572285, (Trichoplax_adhaerens: 7.073607, (Acropora_digitifera: 6.425661, ((Ciona_intestinalis: 5.616424, (Danio_rerio: 4.353947, (Mus_musculus: 0.806088, Homo_sapiens: 0.806088) [&95%={0.620792, 1.32144}]: 3.547859) [&95%={4.21263, 4.53249}]: 1.262476) [&95%={5.20238, 6.06269}]: 0.671700, ((Brachionus_sp: 5.965324, ((Crassostrea_gigas: 5.390733, (Lottia_gigantea: 4.940047, Aplysia_californica: 4.940047) [&95%={4.71444, 5.22343}]: 0.450687) [&95%={5.32271, 5.48576}]: 0.336666, (Alvinella_pompejana: 5.073511, (Helobdella_robusta: 4.380714, Capitella_telata: 4.380714) [&95%={3.27108, 5.12493}]: 0.692797) [&95%={4.78, 5.51566}]: 0.653889) [&95%={5.5269, 5.94305}]: 0.237924) [&95%={5.75525, 6.14854}]: 0.213421, ((Armorloricus_elegans: 5.775141, ((Meiopriapulus_sp: 4.356191, (Priapulus_caudatus: 0.707420, Halicryptus_spinulosus: 0.707420) [&95%={0.221097, 1.88384}]: 3.648771) [&95%={3.17979, 5.24337}]: 1.090722, (Pycnophyes_kielensis: 3.997277, (Echinoderes_sp: 1.315513, Echinoderes_horni: 1.315513) [&95%={0.367849, 3.01489}]: 2.681764) [&95%={2.57376, 5.02997}]: 1.449636) [&95%={5.18521, 5.80379}]: 0.328228) [&95%={5.42684, 6.04432}]: 0.302592, (((Gordius_sp: 3.508892, Nectonema_munidae: 3.508892) [&95%={2.01765, 4.85824}]: 1.757764, ((Xiphinema_index: 3.538303, (Trichuris_muris: 2.206904, Trichinella_spiralis: 2.206904) [&95%={1.14546, 3.38167}]: 1.331400) [&95%={2.50269, 4.52367}]: 0.849659, ((Pristionchus_pacificus: 1.994258, Caenorhabditis_elegans: 1.994258) [&95%={1.33709, 3.02129}]: 1.021362, (Brugia_malayi: 1.968154, Ascaris_sum: 1.968154) [&95%={0.922669, 3.19916}]: 1.047466) [&95%={2.11295, 4.02511}]: 1.372342) [&95%={3.53887, 5.14366}]: 0.878694) [&95%={4.57395, 5.76321}]: 0.715011, (((Actinarctus_doryphorus: 3.385069, (Echiniscus_testudo: 0.721439, Echiniscus_bisetosus: 0.721439) [&95%={0.245094, 1.72021}]: 2.663631) [&95%={2.04439, 4.50602}]: 1.462262, (Milnesium_tardigradum: 3.640464, (Richtersius_coronifer: 2.559416, (Ramazzottius_varieornatus: 1.908842, Hypsibius_dujardini: 1.908842) [&95%={0.839203, 3.18982}]: 0.650574) [&95%={1.39508, 3.74831}]: 1.081048) [&95%={2.50629, 4.60567}]: 1.206867) [&95%={3.96372, 5.48398}]: 1.044680, ((Epiperipatus_sp: 2.274352, (Peripatus_sp: 0.615597, Euperipatoides_kanagrensis: 0.615597) [&95%={0.198772, 1.46552}]: 1.658756) [&95%={1.45458, 4.03041}]: 3.499672, (((Pycnogonum_sp: 4.558344, Anoplodactylus_eroticus: 4.558344) [&95%={4.30632, 5.07147}]: 0.879872, (Limulus_polyphemus: 5.120142, ((Siro_boyerae: 4.243523, Ixodes_scapularis: 4.243523) [&95%={3.15616, 4.83334}]: 0.597890, (Chaerilus_celebensis: 4.546833, (Acanthoscurria_gomesiana: 3.485416, Neoscona_arabesca: 3.485416) [&95%={3.00636, 4.23398}]: 1.061417) [&95%={4.35928, 4.87207}]: 0.294580) [&95%={4.56532, 5.11429}]: 0.278730) [&95%={5.00941, 5.33148}]: 0.318073) [&95%={5.22859, 5.6511}]: 0.198332, (((Scutigera_coleoptrata: 4.629967, (Strigamia_maritima: 4.034353, Lithobius_fortificatus: 4.034353) [&95%={3.83345, 4.46642}]: 0.595614) [&95%={4.23077, 5.07737}]: 0.496196, ((Prostemmiulus_sp: 3.292686, Polydesmus_angustus: 3.292686) [&95%={1.6346, 4.43226}]: 1.314446, (Polyxenus_lagurus: 4.092568, Glomeridesmus_sp: 4.092568) [&95%={3.11233, 4.76976}]: 0.514565) [&95%={4.26548, 5.06489}]: 0.519030) [&95%={4.76563, 5.44066}]: 0.392668, ((Meganyctiphanes_norvegica: 3.180267, (Petrolisthes_cinctipes: 2.256674, Litopenaeus_vannamaei: 2.256674) [&95%={0.883519, 3.71399}]: 0.923593) [&95%={1.67656, 4.45485}]: 2.107541, ((Xibalbanus_tumulensis: 4.603122, (Tigriopus_japonicus: 2.902118, Eurytemora_affinis: 2.902118) [&95%={1.45223, 4.10713}]: 1.701003) [&95%={3.81517, 5.10202}]: 0.503994, ((Artemia_francisca: 4.283793, (Daphnia_magna: 0.585924, Daphnia_pulex: 0.585924) [&95%={0.177792, 1.59062}]: 3.697869) [&95%={4.05886, 4.69859}]: 0.676974, (Folsomia_candida: 4.729687, (Meinertellus_cundinamarcensis: 4.453045, ((Ephemera_danica: 3.674724, Calopteryx_splendens: 3.674724) [&95%={3.22651, 4.1866}]: 0.511406, ((Tetrix_subulata: 3.500983, (Peruphasma_schultei: 3.048568, (Periplaneta_americana: 2.084794, Mantis_religiosa: 2.084794) [&95%={1.34342, 3.02478}]: 0.963774) [&95%={2.08009, 3.63019}]: 0.452415) [&95%={3.21443, 3.9204}]: 0.458738, (Cercopis_vulnerata: 3.800367, ((Gynaikothrips_ficorum: 2.889127, Nasonia_sp: 2.889127) [&95%={1.80839, 3.52529}]: 0.715674, ((Platycentropus_radiatus: 2.463067, Parides_euridedes: 2.463067) [&95%={2.03784, 3.0637}]: 0.913902, (Tribolium_castaneum: 3.150135, Eurelon_nostras: 3.150135) [&95%={3.07125, 3.34748}]: 0.226835) [&95%={3.18961, 3.6385}]: 0.227831) [&95%={3.3609, 3.88643}]: 0.195566) [&95%={3.5299, 4.07901}]: 0.159355) [&95%={3.67775, 4.25166}]: 0.226409) [&95%={3.8836, 4.50104}]: 0.266915) [&95%={4.14161, 4.78069}]: 0.276642) [&95%={4.42636, 5.03385}]: 0.231080) [&95%={4.70458, 5.2345}]: 0.146349) [&95%={4.86846, 5.36759}]: 0.180692) [&95%={5.14713, 5.51585}]: 0.231023) [&95%={5.3378, 5.71208}]: 0.117717) [&95%={5.46295, 5.8155}]: 0.137477) [&95%={5.59926, 5.94416}]: 0.117987) [&95%={5.72362, 6.05072}]: 0.089655) [&95%={5.82189, 6.1315}]: 0.096066) [&95%={5.92859, 6.21373}]: 0.101013) [&95%={6.04498, 6.29914}]: 0.109378) [&95%={6.16749, 6.38828}]: 0.137538) [&95%={6.32471, 6.56549}]: 0.647946) [&95%={6.5733, 7.90237}]: 0.498677) [&95%={6.73885, 8.35843}];

END;
